# Supplementary material
Source: PubMed Central journal article supplement (PMC8513795)
Supplement: NIHMS1002026-supplement-supplemental.pdf [file NIHMS1002026-supplement-supplemental.pdf]

## Supplemental Information:

### Biochemical and Mechanical Gradients Synergize to Enhance Cartilage Zonal Organization in 3D

*Danqing Zhu, Pavin Trinh, Elisa Liu, and Fan Yang\*, Ph.D.*

D. Zhu, E. Liu  
Department of Bioengineering, Stanford University  
Stanford, CA 94305 (USA)

P. Trinh  
Department of Biology, Stanford University  
Stanford, CA 94305 (USA)

Prof. Fan Yang  
Department of Bioengineering, Stanford University  
Department of Orthopaedic Surgery, Stanford University  
Stanford, CA 94305 (USA)

Email: [fanyang@stanford.edu](mailto:fanyang@stanford.edu)

#### **Contents:**

**Figure S1.** Chondrocyte viability within 3D dual-gradient hydrogels at day 1 and day 7 after encapsulation. Live/dead staining of chondrocytes encapsulated within dual-gradient hydrogels from zone 1 to zone 5. Scale bar = 200  $\mu\text{m}$ .

**Figure S2.** Additional quantitation of expression at day 7 in 3D dual-gradient hydrogels of the genes encoding (A) ROCK 2 and (B) Sox 9.

**Figure S3.** Safranin-O staining of sGAG deposition within dual-gradient hydrogels at day 21 and acellular control at day 1. (A) Cells in softer zones did not cluster and had marginal and diffusive sGAG deposition. In stiffer, high CS zones 4 and 5, cells proliferated and formed large cell clusters with extensive sGAG staining. (B) Acellular control. Scale bar = 50  $\mu\text{m}$ .

**Figure S4:** Total wet weights of (A) mechanical-only, (B) CS-only, and (C) dual-gradient hydrogels at day 1 and day 7.

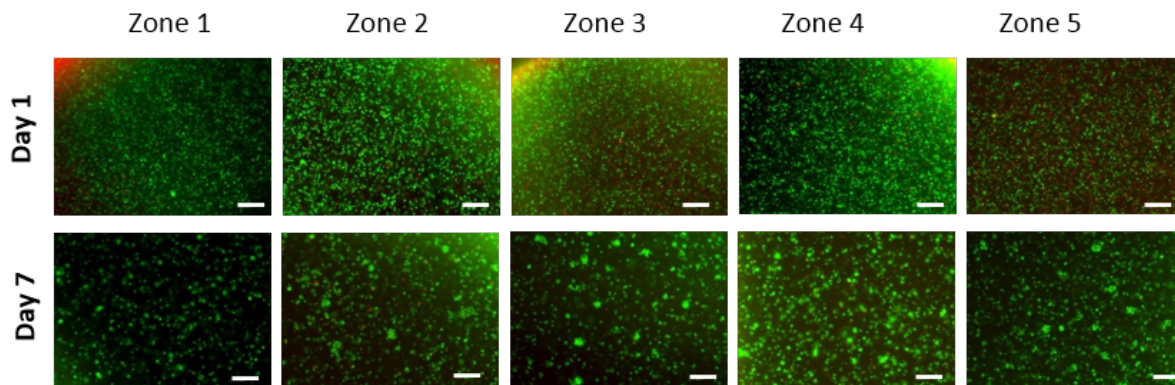

**Figure S1: Chondrocytes viability within 3D dual-gradient hydrogels at Day 1 and Day 7 post-encapsulation.** Live dead staining of chondrocytes encapsulated within dual-gradient hydrogels from zone 1 to zone 5. Scale bar = 200  $\mu\text{m}$ .

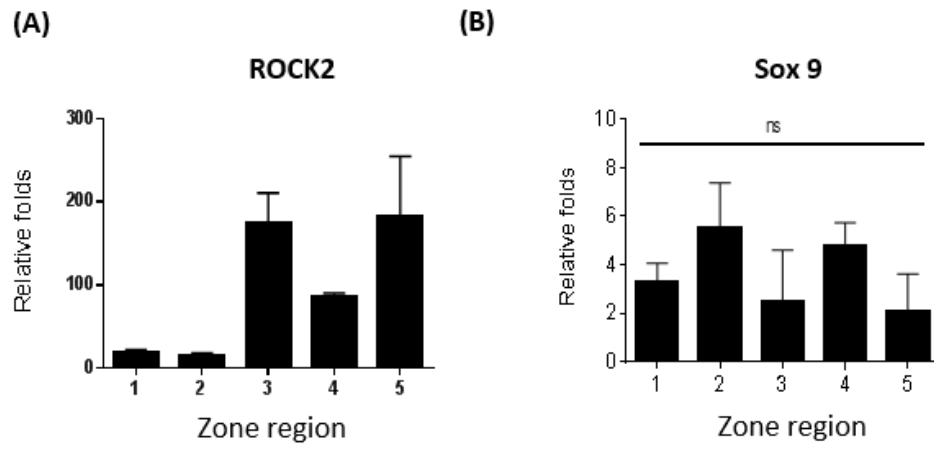

**Figure S2: Additional quantitative gene expressions at Day 7 in 3D dual-gradient hydrogels. (A) ROCK 2; (B) Sox 9**

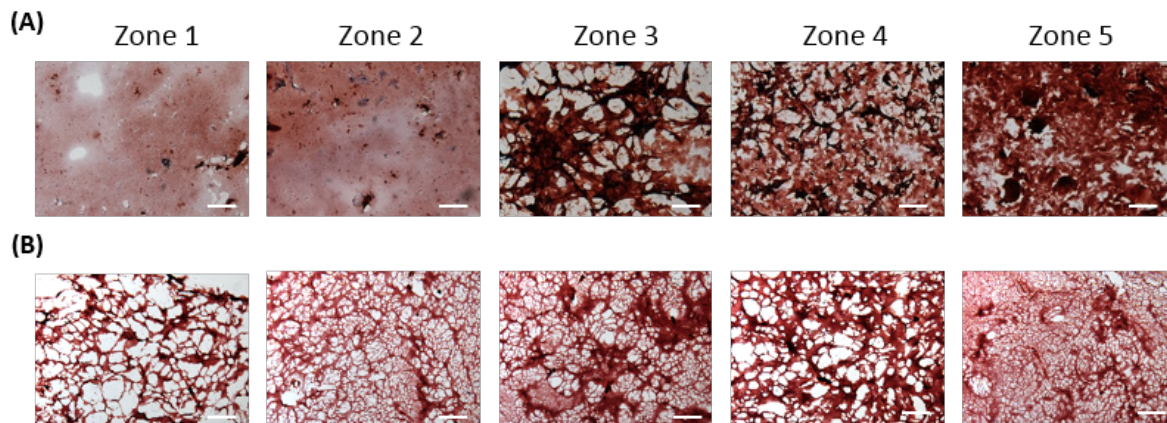

**Figure S3: Safranin-O staining of sGAG deposition within dual-gradient hydrogels at Day 21 and acellular control at Day 1.** (A) Cells in softer zones remained single with only marginal and diffusive sGAG deposition; cells reside in stiffer/high CS zones (i.e. zone 4/5) proliferated and formed large cell clusters with extensive sGAG staining. (B) Acellular control. Scale bar = 50  $\mu\text{m}$ .

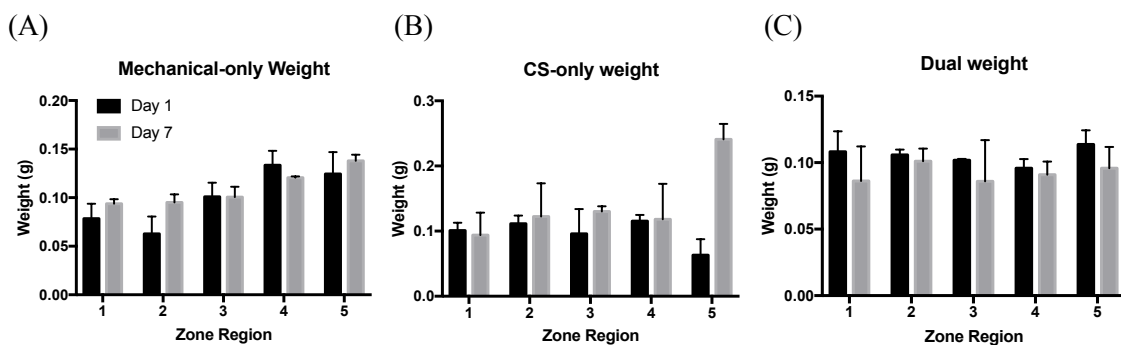

**Figure S4: Total wet weights of (A) mechanical-only, (B) CS-only, and (C) dual-gradient hydrogels at day 1 and day 7.**
